# Supplementary material for: Allelic diversification after transposable element exaptation promotedgsdfas the master sex determining gene of sablefish
Source: HighWire-hosted journal article supplement (doi:10.1101/gr.274266.120), 2021-06-28
Supplement: Supplemental_Data_S1.xlsx [file Supplemental_Data_S1.xlsx]

## Sheet: Supplemental Data (S1) legend
Supplemental Data S1
Supplemental raw data for figures 2, 3, 5, 6, and 7 is given as relative light units (RLU). The data are presented as normalized recorded Gaussia/firefly luciferase activity (see the Methods section for detailed information).

## Sheet: Figure 2
	Figure 2B and 2I-L
				Normalized Gene Expression Levels
	Series	Genetic Sex	Fish Length (mm)	gsdf	gsdfX	gsdfY	wt1a	dmrt1	cyp19a1a	foxl2
	Early Developmental	XX	2		0.0934857	0.00354165	0.873209	2.93373	0.109076	4.66854
	Early Developmental	XX	2		0	0	0.924769	2.53252	0.085378	8.02201
	Early Developmental	XX	2		0	0	1.54801	1.40041	0.143352	7.36067
	Early Developmental	XX	2		0	0	1.42048	2.66486	0.267665	9.97231
	Early Developmental	XX	4		0.0952017	0	1.11998	3.3121	0.269297	12.3376
	Early Developmental	XX	4		0.0342168	0	1.26774	2.69982	1.28332	15.4791
	Early Developmental	XX	5		0	0	1.33703	1.78916	0.259003	22.2576
	Early Developmental	XX	5		0.036513	0	1.47298	3.89165	1.80678	22.9459
	Early Developmental	XX	5		0	0	1.65019	2.14969	0.150373	15.4982
	Early Developmental	XX	6		0	0	2.37371	2.03992	0.164361	24.4887
	Early Developmental	XX	5		0	0	3.2732	1.36932	1.76458	29.0382
	Early Developmental	XX	5		0.0382077	0	3.23774	0.40554	5.23227	28.5293
	Early Developmental	XX	5.4		0	0	1.62741	0.632482	0.0961885	16.8012
	Early Developmental	XX	7		0.100773	0	3.49743	1.25686	23.8469	22.2503
	Early Developmental	XX	7		0.0229808	0	2.74835	1.22971	0.59819	18.7716
	Early Developmental	XX	7		0	0	4.27419	0.154569	23.3338	30.1638
	Early Developmental	XX	6		0.049935	0	4.0483	1.92761	12.6728	20.7776
	Early Developmental	XX	7		0.217418	0	3.6515	0.700873	5.5617	22.9275
	Early Developmental	XX	7		0.311287	0	2.765	1.30141	3.42771	21.2541
	Early Developmental	XX	7		0.216262	0	2.96511	0.988027	4.19972	22.6036
	Early Developmental	XX	7		0.18695	0.0406299	3.50891	0.149505	10.2673	28.9981
	Early Developmental	XX	8		0.283354	0	3.14858	0.98069	7.64473	31.0635
	Early Developmental	XX	8		0.291335	0	1.38371	1.07435	3.7437	21.7507
	Early Developmental	XX	8		0.149252	0	2.54344	2.04007	0.097736	18.7806
	Early Developmental	XX	8		0.181747	0	3.21714	0.823371	7.89611	36.6184
	Early Developmental	XX	9		0.0669867	0	1.24047	0.278628	0.133043	21.5183
	Early Developmental	XX	8		0.0581271	0	1.3363	0.448555	0.2789	30.8076
	Early Developmental	XX	9		0.0313188	0	1.60584	0.396589	2.89865	23.9272
	Early Developmental	XX	10		0.155464	0	1.43175	0.576131	0.151027	20.0936
	Early Developmental	XX	10		0.0529206	0	1.77025	0.777496	1.57283	23.8131
	Early Developmental	XX	10		0.138937	0	1.21995	1.95376	0.292751	18.6165
	Early Developmental	XX	10		0.14629	0	2.04768	1.28539	1.21186	27.6625
	Early Developmental	XX	11		0.239356	0	2.03634	0.849702	4.32684	23.0735
	Early Developmental	XX	9		0.091716	0	1.58326	1.36919	0.171657	26.8669
	Early Developmental	XX	11		0.214374	0	1.65299	1.35946	0.52928	25.671
	Early Developmental	XX	13		0.0961863	0	1.54531	0.594421	2.70911	25.3177
	Early Developmental	XX	16		0.162079	0.018196	2.20151	0.586934	2.78691	10.8611
	Early Developmental	XX	12		0.0427278	0	1.59365	0.308288	3.32499	20.5189
	Early Developmental	XX	14		0.354316	0	1.04094	1.15849	2.19929	14.5613
	Early Developmental	XX	11		0.21104	0	1.50075	1.17191	2.4915	22.375
	Early Developmental	XX	16		0.216596	0	1.04848	0.151864	2.3792	20.6209
	Early Developmental	XX	19		0.317455	0	1.3627	0.437925	2.37011	15.6453
	Early Developmental	XX	21		0.318435	0	1.84924	0.682879	3.01512	22.0009
	Early Developmental	XX	23		0.450316	0	1.36105	0.528289	0.215357	25.4249
	Early Developmental	XX	26		0.430025	0	1.2978	0.86782	0.383104	32.0934
	Early Developmental	XX	26		0.526684	0.0151765	2.07512	1.14411	2.21509	15.6839
	Early Developmental	XX	16		0.132704	0	1.33629	0.220731	0.61662	28.598
	Early Developmental	XX	38		0.447685	0	1.89758	0.187132	2.46488	20.2468
	Early Developmental	XX	29		0.343221	0.00572718	1.78145	0.725665	1.26064	32.6361
	Early Developmental	XX	22		0.808836	0	2.11316	0.550513	0.233098	27.8561
	Early Developmental	XX	25		0.493104	0.00697065	2.87494	0.577114	2.14791	37.3113
	Early Developmental	XY	2		0	0.588459	1.20979	1.6036	0.104453	8.30412
	Early Developmental	XY	2		0.0452388	0.495353	0.837775	1.91379	0.936575	8.0934
	Early Developmental	XY	2		0	0.593716	1.52023	0.604389	0.0604275	8.28096
	Early Developmental	XY	4		0.055464	0.814928	1.00839	2.46855	0.153643	5.55872
	Early Developmental	XY	3		0.00524097	0.96092	1.12375	0.452433	0.273647	12.5642
	Early Developmental	XY	4		0	0.56759	0.680341	0.702364	0.0262372	9.49115
	Early Developmental	XY	5		0	0.670978	1.20554	3.26841	0.110253	22.485
	Early Developmental	XY	5		0	1.1891	1.31633	4.24952	1.78049	23.1361
	Early Developmental	XY	6		0	0.992863	1.09191	2.8217	0.75595	16.7532
	Early Developmental	XY	5		0	1.27743	1.84962	2.78653	1.61329	25.9104
	Early Developmental	XY	5		0.0508452	1.92531	2.89789	2.24037	2.83067	31.5956
	Early Developmental	XY	6		0	1.93029	4.09362	6.26639	3.84754	32.1447
	Early Developmental	XY	6		0	1.16573	3.04978	1.18241	1.11009	30.556
	Early Developmental	XY	6		0.0524112	0.594957	4.03641	0.550667	12.7243	22.0954
	Early Developmental	XY	7		0.0151809	1.19863	4.76525	0.786426	25.2445	26.1151
	Early Developmental	XY	7		0	1.62118	4.46153	1.21678	17.6416	15.4589
	Early Developmental	XY	8		0.0713115	1.51876	3.36224	0.701984	7.61911	25.4933
	Early Developmental	XY	7		0.0418587	1.41188	2.84621	0.849689	4.00572	21.79
	Early Developmental	XY	8		0.174954	0	2.46699	1.02258	3.78826	27.7999
	Early Developmental	XY	7		0.076284	1.41063	3.57596	2.47042	5.9919	23.6357
	Early Developmental	XY	8		0.0337956	1.22588	2.22627	4.08263	6.6778	24.2893
	Early Developmental	XY	7		0.103359	0.998998	2.0998	0.405461	1.4849	19.1898
	Early Developmental	XY	8		0.152811	0.640634	1.89563	0.0954167	1.05698	22.1116
	Early Developmental	XY	7.7		0.0866436	0.877947	2.21757	0.432123	1.11352	24.6973
	Early Developmental	XY	9		0.0274218	0.788266	1.22151	0.763787	2.80986	20.3605
	Early Developmental	XY	8		0.0356046	0.383857	1.61653	0.886468	1.47242	27.6802
	Early Developmental	XY	8		0.0273358	0.574816	0.879999	0.335574	1.07716	15.5637
	Early Developmental	XY	8		0.0834711	0.685663	1.45601	0.887157	0.118	26.9998
	Early Developmental	XY	10		0.0590964	1.05339	1.91418	0.596578	3.05706	23.1076
	Early Developmental	XY	10		0.0969315	0.745457	1.78749	0.494999	5.91737	27.9544
	Early Developmental	XY	9		0.0746148	0.972324	1.82596	0.357704	2.75416	22.4028
	Early Developmental	XY	10		0.148581	0.604446	1.49096	0.656463	1.57669	21.8879
	Early Developmental	XY	11		0.0830367	0.831392	1.69333	1.27479	0.120191	29.2828
	Early Developmental	XY	11		0	0.88226	1.73378	0.153366	0.090745	22.1211
	Early Developmental	XY	10		0.158715	0.781461	1.91347	0.424817	1.55067	23.8359
	Early Developmental	XY	10		0.0858684	0.577074	1.22392	0.273067	6.01449	23.191
	Early Developmental	XY	12		0.0524508	0.613359	1.68431	0.893305	1.98779	21.1352
	Early Developmental	XY	12		0.0157154	0.695027	1.71578	0.740354	0.81359	17.2716
	Early Developmental	XY	15		0.0765351	1.71163	1.65485	0.768058	0.333091	20.7567
	Early Developmental	XY	17		0.0617775	0.463823	1.66337	0.114859	1.67659	24.0495
	Early Developmental	XY	20		0.138368	1.86031	1.34059	0.2464	0.895555	20.5377
	Early Developmental	XY	15		0.23707	1.11035	1.45568	0.610966	1.26165	24.5368
	Early Developmental	XY	16		0.0426423	1.1328	1.45471	0.797657	0.88459	23.6369
	Early Developmental	XY	17		0.170939	1.23807	1.26743	0.58995	0.238773	27.4261
	Early Developmental	XY	21		0.190278	0.853981	1.62593	0.184753	1.22426	23.7572
	Early Developmental	XY	24		0.199531	4.40122	1.54941	0.71926	4.49137	25.2713
	Early Developmental	XY	16		0.161095	1.2182	1.50881	0.595838	1.31179	31.1565
	Early Developmental	XY	23		0.104414	1.97077	1.61964	0.524841	0.453693	40.9513
	Early Developmental	XY	38		0.41395	4.48997	2.25398	0.163499	0.207963	22.1871
	Early Developmental	XY	32		0.363556	3.12545	2.35515	0.550288	0.214034	21.9929
	Early Developmental	XY	37		0.362111	3.94392	1.97315	0.169838	0.125906	18.414
	Hayman et al., 2021	XX	19	0.506785	N/A	N/A	2.03394	0.289086	0.507265	17.7597
	Hayman et al., 2021	XX	19	0.251119	N/A	N/A	1.88876	5.65907	0.157691	69.8087
	Hayman et al., 2021	XX	23	0.735416	N/A	N/A	1.93189	0	1.1109	32.9364
	Hayman et al., 2021	XX	24	1.01893	N/A	N/A	0.938393	0.0337758	0.0924038	12.0605
	Hayman et al., 2021	XX	26	0.676081	N/A	N/A	1.29234	0.788432	13.0436	11.1405
	Hayman et al., 2021	XX	28	1.4868	N/A	N/A	1.28646	0.109469	0.264196	18.6905
	Hayman et al., 2021	XX	29	2.38989	N/A	N/A	1.00865	0.120169	0.159047	16.5131
	Hayman et al., 2021	XX	42	1.97678	N/A	N/A	1.4293	0.926306	3.56313	16.7585
	Hayman et al., 2021	XX	43	1.68388	N/A	N/A	1.34258	2.85442	0	11.9311
	Hayman et al., 2021	XX	45	2.64452	N/A	N/A	0.679824	1.73931	6.4267	11.6991
	Hayman et al., 2021	XX	45	2.18789	N/A	N/A	1.26801	2.44097	4.09203	26.9338
	Hayman et al., 2021	XX	52	1.47818	N/A	N/A	0.12602	0	30.5215	3.96829
	Hayman et al., 2021	XX	54	2.69936	N/A	N/A	1.65814	0.217443	104.696	17.2158
	Hayman et al., 2021	XX	54	5.8301	N/A	N/A	3.04612	0.523012	514.428	49.6416
	Hayman et al., 2021	XX	54	4.74125	N/A	N/A	2.04426	2.61685	638.182	71.2969
	Hayman et al., 2021	XX	58	5.28402	N/A	N/A	1.65167	3.29461	299.389	30.403
	Hayman et al., 2021	XX	58	6.03217	N/A	N/A	1.29704	2.45757	182.503	14.9429
	Hayman et al., 2021	XX	58	4.38483	N/A	N/A	3.22728	0.290529	1168.92	50.4921
	Hayman et al., 2021	XX	58	2.25693	N/A	N/A	1.24892	5.91807	183.924	21.5234
	Hayman et al., 2021	XX	61	3.7697	N/A	N/A	4.15948	1.43707	985.247	56.6849
	Hayman et al., 2021	XX	61	4.14094	N/A	N/A	2.98058	0.109099	702.382	44.1178
	Hayman et al., 2021	XX	67	4.99913	N/A	N/A	1.87836	5.11504	648.827	33.2157
	Hayman et al., 2021	XX	68	5.13232	N/A	N/A	3.13529	4.01158	672.706	8.38693
	Hayman et al., 2021	XX	69	3.82533	N/A	N/A	3.51033	6.28465	569.941	31.9052
	Hayman et al., 2021	XX	73	3.77544	N/A	N/A	1.53715	0	440.757	26.3935
	Hayman et al., 2021	XX	73	8.48775	N/A	N/A	9.48599	1.35036	1900.9	113.541
	Hayman et al., 2021	XX	73	10.8496	N/A	N/A	2.64429	2.01877	440.59	27.9868
	Hayman et al., 2021	XX	74	9.54773	N/A	N/A	3.38891	10.9688	1230.38	78.6115
	Hayman et al., 2021	XX	74	6.9365	N/A	N/A	3.08874	0	1689.37	69.9351
	Hayman et al., 2021	XX	74	13.8613	N/A	N/A	4.76105	0	574.087	18.3021
	Hayman et al., 2021	XX	75	13.5372	N/A	N/A	4.58478	2.50011	1942.32	111.846
	Hayman et al., 2021	XX	76	10.8855	N/A	N/A	6.88854	2.64503	2362.45	83.5673
	Hayman et al., 2021	XX	77	8.75385	N/A	N/A	4.23621	0	729.259	27.7775
	Hayman et al., 2021	XX	77	8.56296	N/A	N/A	3.53435	1.1207	639.029	52.3368
	Hayman et al., 2021	XX	78	4.40735	N/A	N/A	2.27399	5.7805	734.44	16.3425
	Hayman et al., 2021	XX	78	8.84369	N/A	N/A	3.29448	5.41284	1243.04	71.0802
	Hayman et al., 2021	XX	78	7.9327	N/A	N/A	2.25325	0	486.897	40.3466
	Hayman et al., 2021	XX	81	8.42644	N/A	N/A	4.10615	2.6934	2140	199.863
	Hayman et al., 2021	XX	82	11.2156	N/A	N/A	7.15073	5.13488	715.416	77.371
	Hayman et al., 2021	XX	82	11.959	N/A	N/A	3.60408	1.01275	746.901	65.7469
	Hayman et al., 2021	XX	83	21.3288	N/A	N/A	3.96142	3.64685	883.152	69.054
	Hayman et al., 2021	XX	84	6.17433	N/A	N/A	5.06909	0.563417	1171.67	106.583
	Hayman et al., 2021	XX	84	10.9824	N/A	N/A	3.12697	1.36229	619.383	68.2797
	Hayman et al., 2021	XX	85	10.8127	N/A	N/A	3.60725	1.27072	1044.98	83.1483
	Hayman et al., 2021	XX	88	14.4341	N/A	N/A	8.02979	15.1208	3693.38	139.13
	Hayman et al., 2021	XX	89	6.74117	N/A	N/A	3.12853	0.630069	848.013	91.63
	Hayman et al., 2021	XX	89	8.34498	N/A	N/A	4.01833	1.26218	1117.21	100.143
	Hayman et al., 2021	XX	90	8.7372	N/A	N/A	4.43749	0	930.017	87.3981
	Hayman et al., 2021	XX	90	22.5435	N/A	N/A	3.54152	2.66953	996.073	95.5134
	Hayman et al., 2021	XX	91	11.6131	N/A	N/A	5.4788	13.403	1767.12	167.245
	Hayman et al., 2021	XX	92	10.1987	N/A	N/A	2.57503	2.51108	1180.8	42.1094
	Hayman et al., 2021	XX	93	6.05298	N/A	N/A	4.02419	1.35392	1899.31	93.9444
	Hayman et al., 2021	XX	93	9.34979	N/A	N/A	11.1733	3.08482	1009.85	157.335
	Hayman et al., 2021	XX	93	15.7063	N/A	N/A	2.74153	0	663.88	37.6789
	Hayman et al., 2021	XX	94	7.45192	N/A	N/A	2.7163	1.87197	267.412	20.8823
	Hayman et al., 2021	XX	95	6.6149	N/A	N/A	7.09603	1.8153	2150.81	149.444
	Hayman et al., 2021	XX	96	7.21505	N/A	N/A	3.37754	1.43514	789.804	48.5657
	Hayman et al., 2021	XX	97	22.0044	N/A	N/A	6.74003	2.57514	3041.86	148.66
	Hayman et al., 2021	XX	97	11.2267	N/A	N/A	7.06595	2.62888	1534.7	140.661
	Hayman et al., 2021	XX	97	15.3249	N/A	N/A	8.50995	19.9243	1844.96	132.458
	Hayman et al., 2021	XX	100	11.4958	N/A	N/A	3.89394	2.74896	698.07	86.7802
	Hayman et al., 2021	XX	100	11.6314	N/A	N/A	3.40342	0	995.834	57.6226
	Hayman et al., 2021	XX	100	14.0262	N/A	N/A	5.45176	5.23293	1809.51	118.641
	Hayman et al., 2021	XX	102	17.9099	N/A	N/A	5.7839	8.79986	2763.39	306.35
	Hayman et al., 2021	XX	102	11.6516	N/A	N/A	4.30859	0.729211	606.154	76.619
	Hayman et al., 2021	XX	103	6.12646	N/A	N/A	3.79893	0.348735	802.734	98.1583
	Hayman et al., 2021	XX	103	12.2061	N/A	N/A	4.29355	2.95994	731.571	62.6937
	Hayman et al., 2021	XX	105	12.137	N/A	N/A	3.85242	1.56008	449.72	92.3019
	Hayman et al., 2021	XX	117	11.3449	N/A	N/A	4.47997	1.06729	787.826	79.3583
	Hayman et al., 2021	XX	118	10.4561	N/A	N/A	6.25564	5.876	1324.73	273.954
	Hayman et al., 2021	XX	119	11.2263	N/A	N/A	3.56861	8.18301	1148.77	126.633
	Hayman et al., 2021	XX	125	7.1444	N/A	N/A	7.416	2.20351	1715.42	203.594
	Hayman et al., 2021	XX	125	15.4995	N/A	N/A	6.08059	10.5928	798.006	140.174
	Hayman et al., 2021	XX	127	9.85629	N/A	N/A	3.02277	1.88308	494.09	91.4404
	Hayman et al., 2021	XX	129	15.9834	N/A	N/A	3.11843	38.1138	851.655	102.252
	Hayman et al., 2021	XX	129	12.7538	N/A	N/A	3.35724	1.75485	784.283	113.511
	Hayman et al., 2021	XX	131	17.7394	N/A	N/A	5.35122	2.32897	614.303	82.9582
	Hayman et al., 2021	XX	131	17.5142	N/A	N/A	5.29828	15.9373	922.682	104.92
	Hayman et al., 2021	XX	132	13.2372	N/A	N/A	3.64177	1.71269	599.204	57.5195
	Hayman et al., 2021	XX	134	9.49195	N/A	N/A	3.08293	4.39361	619.024	80.2351
	Hayman et al., 2021	XX	136	9.12419	N/A	N/A	3.08576	1.78297	419.503	48.1841
	Hayman et al., 2021	XX	137	16.9279	N/A	N/A	3.46088	5.15411	596.796	99.0763
	Hayman et al., 2021	XX	137	15.65	N/A	N/A	3.98246	4.85089	642.065	71.5747
	Hayman et al., 2021	XX	138	11.3149	N/A	N/A	3.29032	1.06727	350.857	53.5697
	Hayman et al., 2021	XX	140	15.2797	N/A	N/A	3.77788	9.65834	508.516	2.06967
	Hayman et al., 2021	XX	143	16.8676	N/A	N/A	3.89596	9.22035	760.101	125.117
	Hayman et al., 2021	XX	143	8.42934	N/A	N/A	1.80304	2.08696	640.298	60.0928
	Hayman et al., 2021	XX	148	10.102	N/A	N/A	2.77533	6.09895	489.757	77.0283
	Hayman et al., 2021	XX	151	14.3238	N/A	N/A	1.82245	8.11883	405.584	71.239
	Hayman et al., 2021	XX	152	22.2924	N/A	N/A	2.51053	2.2399	567.647	90.8653
	Hayman et al., 2021	XX	158	13.8909	N/A	N/A	1.49359	3.59148	576.326	89.7472
	Hayman et al., 2021	XX	159	17.4872	N/A	N/A	3.66327	6.49129	546.915	126.647
	Hayman et al., 2021	XX	162	19.6344	N/A	N/A	3.41723	5.87981	728.469	129.915
	Hayman et al., 2021	XX	162	13.309	N/A	N/A	2.87407	6.09377	664.488	101.366
	Hayman et al., 2021	XX	179	12.6034	N/A	N/A	2.54391	5.73954	817.716	192.799
	Hayman et al., 2021	XX	198	13.2007	N/A	N/A	1.54535	1.60799	277.299	67.5274
	Hayman et al., 2021	XX	200	23.6949	N/A	N/A	2.57052	5.29571	489.182	111.041
	Hayman et al., 2021	XX	215	15.2487	N/A	N/A	1.57064	6.08356	318.035	83.7392
	Hayman et al., 2021	XX	220	16.214	N/A	N/A	0.870057	3.18094	152.916	24.5318
	Hayman et al., 2021	XX	225	18.2675	N/A	N/A	2.06529	5.63848	199.282	87.3923
	Hayman et al., 2021	XX	226	13.4981	N/A	N/A	1.31767	3.55448	232.753	42.3463
	Hayman et al., 2021	XX	230	13.4679	N/A	N/A	0.784609	0.337537	91.9047	44.345
	Hayman et al., 2021	XX	237	11.4084	N/A	N/A	1.10269	2.81276	135.747	31.1087
	Hayman et al., 2021	XY	14	0.376946	N/A	N/A	2.09573	2.90339	0.190605	10.8774
	Hayman et al., 2021	XY	17	0.764909	N/A	N/A	1.28156	0.340152	0.852752	51.3289
	Hayman et al., 2021	XY	18	0.82218	N/A	N/A	1.55368	0.337549	0	21.9476
	Hayman et al., 2021	XY	18	0.529656	N/A	N/A	1.80348	0.578737	0	33.7287
	Hayman et al., 2021	XY	20	1.0905	N/A	N/A	2.04064	2.83166	0	28.0133
	Hayman et al., 2021	XY	22	1.82048	N/A	N/A	1.16779	4.66746	0	11.5218
	Hayman et al., 2021	XY	25	1.59532	N/A	N/A	0.892219	4.23456	5.95664	22.4327
	Hayman et al., 2021	XY	31	2.64	N/A	N/A	1.66933	0.27648	6.7888	19.2115
	Hayman et al., 2021	XY	33	3.92299	N/A	N/A	0.897295	2.5038	0	7.4082
	Hayman et al., 2021	XY	37	3.62488	N/A	N/A	1.48412	0.474797	0	15.8653
	Hayman et al., 2021	XY	38	4.45302	N/A	N/A	1.08974	0.184297	0	24.0658
	Hayman et al., 2021	XY	43	5.42162	N/A	N/A	1.44431	31.3538	0.256138	37.0268
	Hayman et al., 2021	XY	46	5.60219	N/A	N/A	1.2169	1.301	6.57837	20.4016
	Hayman et al., 2021	XY	52	2.96475	N/A	N/A	1.41581	0.120001	18.615	9.63981
	Hayman et al., 2021	XY	54	3.96606	N/A	N/A	2.00566	0	3.00947	30.0996
	Hayman et al., 2021	XY	56	7.23764	N/A	N/A	2.08687	32.7338	8.42372	19.327
	Hayman et al., 2021	XY	57	5.2627	N/A	N/A	1.51705	3.30163	0.192392	28.1641
	Hayman et al., 2021	XY	58	7.44534	N/A	N/A	2.80864	18.8153	18.5343	16.043
	Hayman et al., 2021	XY	61	8.21372	N/A	N/A	2.19119	31.8658	1.64248	29.2431
	Hayman et al., 2021	XY	63	12.8308	N/A	N/A	2.57516	43.8523	0.396144	17.0026
	Hayman et al., 2021	XY	64	12.2685	N/A	N/A	3.08223	41.1686	10.0751	19.8904
	Hayman et al., 2021	XY	64	8.26067	N/A	N/A	2.43592	5.74451	0.235712	7.14432
	Hayman et al., 2021	XY	65	14.2313	N/A	N/A	4.08644	67.2742	0	7.49404
	Hayman et al., 2021	XY	69	7.55589	N/A	N/A	2.25668	4.95045	23.566	35.0495
	Hayman et al., 2021	XY	70	26.1229	N/A	N/A	4.64538	74.1467	6.69128	23.7986
	Hayman et al., 2021	XY	71	19.7342	N/A	N/A	3.18203	57.4897	7.47724	13.8307
	Hayman et al., 2021	XY	74	35.9731	N/A	N/A	3.78501	349.445	26.2306	60.9394
	Hayman et al., 2021	XY	75	19.4407	N/A	N/A	3.78629	62.1867	0	10.6013
	Hayman et al., 2021	XY	76	28.7557	N/A	N/A	2.58819	42.2574	0.237997	10.7167
	Hayman et al., 2021	XY	76	20.1103	N/A	N/A	2.77721	116.253	0	12.6389
	Hayman et al., 2021	XY	77	24.9953	N/A	N/A	4.92634	64.4735	19.2689	26.2837
	Hayman et al., 2021	XY	79	6.67194	N/A	N/A	3.06354	13.8415	0.485312	21.5401
	Hayman et al., 2021	XY	79	35.6307	N/A	N/A	3.59571	178.845	1.7924	34.4373
	Hayman et al., 2021	XY	80	15.7283	N/A	N/A	2.99695	39.5557	0.744757	61.01
	Hayman et al., 2021	XY	82	18.8895	N/A	N/A	4.73043	71.2878	12.6115	3.45033
	Hayman et al., 2021	XY	83	24.5148	N/A	N/A	4.75701	88.958	19.6717	19.537
	Hayman et al., 2021	XY	85	35.4949	N/A	N/A	5.52655	143.164	11.3803	3.27093
	Hayman et al., 2021	XY	87	33.9282	N/A	N/A	3.31205	69.1994	0.336673	2.37923
	Hayman et al., 2021	XY	90	51.87	N/A	N/A	3.41478	101.743	0.371606	0
	Hayman et al., 2021	XY	91	37.0677	N/A	N/A	2.53194	104.687	2.68963	0.789458
	Hayman et al., 2021	XY	92	15.5408	N/A	N/A	3.48862	96.8628	8.38549	12.8621
	Hayman et al., 2021	XY	92	29.9397	N/A	N/A	4.80619	103.42	3.96436	3.95336
	Hayman et al., 2021	XY	95	29.6601	N/A	N/A	3.24748	77.8688	4.66804	2.39545
	Hayman et al., 2021	XY	96	23.0771	N/A	N/A	8.64225	100.236	5.31555	2.55868
	Hayman et al., 2021	XY	98	73.6801	N/A	N/A	3.02043	162.882	6.81442	3.46217
	Hayman et al., 2021	XY	100	46.013	N/A	N/A	3.02459	92.1938	3.1883	0
	Hayman et al., 2021	XY	101	47.5887	N/A	N/A	3.52445	81.571	14.4575	1.29223
	Hayman et al., 2021	XY	102	45.9247	N/A	N/A	4.05788	96.7427	2.74058	1.06241
	Hayman et al., 2021	XY	105	44.8948	N/A	N/A	7.40328	136.653	5.74779	1.48735
	Hayman et al., 2021	XY	107	33.5596	N/A	N/A	2.82595	103.586	3.57144	2.52462
	Hayman et al., 2021	XY	109	38.2314	N/A	N/A	13.4501	124.873	23.5766	3.35273
	Hayman et al., 2021	XY	110	43.326	N/A	N/A	3.00712	85.8828	3.7302	0
	Hayman et al., 2021	XY	112	71.9021	N/A	N/A	5.81493	217.789	7.86522	1.5367
	Hayman et al., 2021	XY	116	31.3928	N/A	N/A	18.0423	104.801	0.893293	5.56602
	Hayman et al., 2021	XY	116	54.4431	N/A	N/A	3.22635	137.083	6.98736	2.22984
	Hayman et al., 2021	XY	117	37.925	N/A	N/A	4.23722	151.444	1.71235	2.05393
	Hayman et al., 2021	XY	117	42.9868	N/A	N/A	4.27079	121.398	0.0351493	2.41786
	Hayman et al., 2021	XY	118	34.7323	N/A	N/A	3.87454	136.849	2.90117	1.88814
	Hayman et al., 2021	XY	118	43.5165	N/A	N/A	4.40441	140.585	4.19187	0.0401574
	Hayman et al., 2021	XY	125	56.6781	N/A	N/A	3.78893	152.261	1.08736	1.49006
	Hayman et al., 2021	XY	125	32.1744	N/A	N/A	3.4659	177.567	1.92974	3.51683
	Hayman et al., 2021	XY	127	60.1401	N/A	N/A	3.68087	131.687	11.5169	0
	Hayman et al., 2021	XY	127	32.2905	N/A	N/A	3.50224	109.646	4.2971	0
	Hayman et al., 2021	XY	128	30.8741	N/A	N/A	2.74168	123.558	0.693223	1.79524
	Hayman et al., 2021	XY	130	44.8487	N/A	N/A	4.58737	108.96	5.02527	0.842414
	Hayman et al., 2021	XY	130	45.2858	N/A	N/A	3.13542	160.391	3.20773	0.413352
	Hayman et al., 2021	XY	130	47.4766	N/A	N/A	3.27714	165.264	2.97953	1.6419
	Hayman et al., 2021	XY	130	37.8617	N/A	N/A	4.51217	783.435	0.19122	0
	Hayman et al., 2021	XY	132	60.6285	N/A	N/A	2.96576	135.149	4.84223	3.10934
	Hayman et al., 2021	XY	132	16.0748	N/A	N/A	0.920141	30.9855	3.78177	0
	Hayman et al., 2021	XY	133	36.5512	N/A	N/A	2.10998	82.0136	2.97765	1.35997
	Hayman et al., 2021	XY	134	50.4486	N/A	N/A	3.53212	233.233	1.83217	2.61441
	Hayman et al., 2021	XY	139	61.5507	N/A	N/A	3.25244	175.899	5.29278	0.764336
	Hayman et al., 2021	XY	141	53.6003	N/A	N/A	4.04614	251.786	6.72694	2.45391
	Hayman et al., 2021	XY	141	53.6061	N/A	N/A	2.70252	94.7186	2.64436	2.27285
	Hayman et al., 2021	XY	144	68.5209	N/A	N/A	1.79939	215.014	1.31464	0
	Hayman et al., 2021	XY	146	49.4199	N/A	N/A	2.02019	145.997	0	0
	Hayman et al., 2021	XY	146	33.3535	N/A	N/A	2.45258	160.619	3.11348	5.07656
	Hayman et al., 2021	XY	152	46.3483	N/A	N/A	2.45236	121.306	5.6137	1.00099
	Hayman et al., 2021	XY	153	32.0349	N/A	N/A	2.5981	180.896	6.12926	0
	Hayman et al., 2021	XY	155	54.5987	N/A	N/A	2.87055	128.518	1.61824	0
	Hayman et al., 2021	XY	157	48.7248	N/A	N/A	3.10967	187.387	4.41089	2.02803
	Hayman et al., 2021	XY	161	63.4228	N/A	N/A	2.36739	130.918	1.47462	1.97097
	Hayman et al., 2021	XY	174	57.5034	N/A	N/A	2.34064	316.523	0.270049	1.39328
	Hayman et al., 2021	XY	174	68.3727	N/A	N/A	3.27474	197.355	7.48142	1.93877
	Hayman et al., 2021	XY	175	60.9074	N/A	N/A	2.65395	323.934	2.17898	0
	Hayman et al., 2021	XY	182	67.5772	N/A	N/A	2.54399	257.658	1.4153	1.66408
	Hayman et al., 2021	XY	189	51.5003	N/A	N/A	2.43845	98.2107	4.97667	0
	Hayman et al., 2021	XY	195	88.1608	N/A	N/A	2.28982	156.456	0	0.735441
	Hayman et al., 2021	XY	199	47.8649	N/A	N/A	1.92981	79.0522	3.42137	2.74272
	Hayman et al., 2021	XY	210	71.6916	N/A	N/A	2.76176	318.03	2.94821	0
	Hayman et al., 2021	XY	217	45.981	N/A	N/A	3.95645	80.7429	2.2594	1.17952
	Hayman et al., 2021	XY	220	57.87	N/A	N/A	2.4187	86.2984	2.34667	1.8973
	Hayman et al., 2021	XY	229	54.1983	N/A	N/A	1.91804	160.313	1.66599	2.91241
	Hayman et al., 2021	XY	230	76.8039	N/A	N/A	2.07569	142.669	1.99612	0.766611

## Sheet: Figure 3
	Figure 3
		Smad1/Ctr	Smad1/GsdfX			Smad2/Ctr	Smad2/GsdfX			Smad3/Ctr	Smad3/GsdfX			Smad5/Ctr	Smad5/GsdfX			Smad8/Ctr	Smad8/GsdfX
	FireFly 1	263824	338537		FireFly 1	210159	283227		FireFly 1	254124	262458		FireFly 1	323844	230760		FireFly 1	298401	185636
	FireFly 2	325296	272544		FireFly 2	248692	247840		FireFly 2	248138	307856		FireFly 2	276910	311072		FireFly 2	226214	232694
	FireFly 3	330871	319514		FireFly 3	256302	295775		FireFly 3	225736	259505		FireFly 3	254553	193732		FireFly 3	265112	253836
	FireFly 4	271320	309187		FireFly 4	284356	288057		FireFly 4	249665	262360		FireFly 4	246312	276770		FireFly 4	244578	239247
	FireFly 5	316668	303786		FireFly 5	302004	260604		FireFly 5	283668	262729		FireFly 5	261163	281494		FireFly 5	255687	264464
	FireFly 6	273975	323680		FireFly 6	280563	274032		FireFly 6	232183	242759		FireFly 6	252997	283096		FireFly 6	338346	220723
	FireFly 7	299325	251412						FireFly 7	294560	225016		FireFly 7	275935			FireFly 7	299012
																	FireFly 8	313428
	Gaussia 1	330	897		Gaussia 1	309	1323		Gaussia 1	1116	5397		Gaussia 1	834	576		Gaussia 1	741	462
	Gaussia 2	504	936		Gaussia 2	680	1056		Gaussia 2	1595	5424		Gaussia 2	652	672		Gaussia 2	608	583
	Gaussia 3	425	832		Gaussia 3	370	1201		Gaussia 3	1148	5695		Gaussia 3	519	840		Gaussia 3	404	781
	Gaussia 4	798	665		Gaussia 4	496	1344		Gaussia 4	828	5992		Gaussia 4	432	871		Gaussia 4	567	252
	Gaussia 5	836	924		Gaussia 5	636	1368		Gaussia 5	902	6923		Gaussia 5	385	726		Gaussia 5	759	512
	Gaussia 6	575	1394		Gaussia 6	468	2160		Gaussia 6	1845	4488		Gaussia 6	678	539		Gaussia 6	501	513
	Gaussia 7	3055	1218						Gaussia 7	4928	5324		Gaussia 7	1155			Gaussia 7	596
																	Gaussia 8	512
	G/F-1	0.00125083	0.00264964		G/F-1	0.00147032	0.00467116		G/F-1	0.00439156	0.0205633		G/F-1	0.00257531	0.0024961		G/F-1	0.00248324	0.00248874
	G/F-2	0.00154936	0.00343431		G/F-2	0.00273431	0.00426081		G/F-2	0.00642787	0.0176186		G/F-2	0.00235456	0.00216027		G/F-2	0.00268772	0.00250544
	G/F-3	0.00128449	0.00260395		G/F-3	0.00144361	0.00406052		G/F-3	0.00508559	0.0219456		G/F-3	0.00203887	0.00433589		G/F-3	0.00152388	0.00307679
	G/F-4	0.00294118	0.0021508		G/F-4	0.00174429	0.00466574		G/F-4	0.00331644	0.0228388		G/F-4	0.00175387	0.00314702		G/F-4	0.00231828	0.0010533
	G/F-5	0.00263999	0.00304161		G/F-5	0.00210593	0.00524934		G/F-5	0.00317977	0.0263503		G/F-5	0.00147418	0.0025791		G/F-5	0.00296847	0.00193599
	G/F-6	0.00209873	0.00430672		G/F-6	0.00166807	0.00788229		G/F-6	0.00794632	0.0184875		G/F-6	0.00267987	0.00190395		G/F-6	0.00148073	0.00232418
	G/F-7	0.0102063	0.00484464						G/F-7	0.01673	0.0236605		G/F-7	0.00418577			G/F-7	0.00199323
																	G/F-8	0.00163355
	Average	0.0031387	0.00329024		Average	0.00186109	0.00513165		Average	0.00672537	0.0216378		Average	0.00243749	0.00277039		Average	0.00213614	0.00223074
		1	1.04828			1	2.75734			1	3.21734			1	1.13657			1	1.04429
		Smad1/Ctr	Smad1/GsdfY			Smad2/Ctr	Smad2/GsdfY			Smad3/Ctr	Smad3/GsdfY			Smad5/Ctr	Smad5/GsdfY			Smad8/Ctr	Smad8/GsdfY
	FireFly 1	115953	247767		FireFly 1	275572	275418		FireFly 1	246104	297976		FireFly 1	220115	281178		FireFly 1	104386	258248
	FireFly 2	133235	230553		FireFly 2	225101	339416		FireFly 2	305226	265704		FireFly 2	218166	254162		FireFly 2	134277	250443
	FireFly 3	147758	225852		FireFly 3	187015	316667		FireFly 3	296214	265048		FireFly 3	153908	265760		FireFly 3	169099	254484
	FireFly 4	198183	247221		FireFly 4	245442	311102		FireFly 4	274302	276678		FireFly 4	220896	334719		FireFly 4	104840	270784
	FireFly 5	270738	212336		FireFly 5	218716	335808		FireFly 5	301488	236533		FireFly 5	218273	290637		FireFly 5	110926	226471
					FireFly 6	233944	309336		FireFly 6	283120	320634		FireFly 6	161927	293783		FireFly 6	119242	257778
									FireFly 7	281214	272976		FireFly 7		250728		FireFly 7	123621
									FireFly 8	271692	331488						FireFly 8	133242
	Gaussia 1	244	637		Gaussia 1	854	1305		Gaussia 1	3064	5754		Gaussia 1	577	396		Gaussia 1	352	864
	Gaussia 2	199	504		Gaussia 2	771	1771		Gaussia 2	3624	4356		Gaussia 2	424	855		Gaussia 2	429	1260
	Gaussia 3	390	396		Gaussia 3	621	3705		Gaussia 3	1956	6356		Gaussia 3	451	888		Gaussia 3	267	1392
	Gaussia 4	792	513		Gaussia 4	575	3960		Gaussia 4	2444	6308		Gaussia 4	579	936		Gaussia 4	268	682
	Gaussia 5	798	702		Gaussia 5	685	3888		Gaussia 5	4208	5181		Gaussia 5	560	1089		Gaussia 5	292	624
					Gaussia 6	606	2160		Gaussia 6	1840	8316		Gaussia 6	506	841		Gaussia 6	285	561
									Gaussia 7	2244	9020		Gaussia 7		672		Gaussia 7	185
									Gaussia 8	1908	16236						Gaussia 8	190
	G/F-1	0.0021043	0.00257096		G/F-1	0.00309901	0.00473825		G/F-1	0.01245	0.0193103		G/F-1	0.00262136	0.00140836		G/F-1	0.0033721	0.00334562
	G/F-2	0.0014936	0.00218605		G/F-2	0.00342513	0.00521779		G/F-2	0.0118732	0.0163942		G/F-2	0.00194347	0.003364		G/F-2	0.00319489	0.00503108
	G/F-3	0.00263945	0.00175336		G/F-3	0.00332059	0.0117		G/F-3	0.00660333	0.0239806		G/F-3	0.00293032	0.00334136		G/F-3	0.00157896	0.00546989
	G/F-4	0.00399631	0.00207507		G/F-4	0.00234271	0.0127289		G/F-4	0.00890989	0.0227991		G/F-4	0.00262114	0.00279638		G/F-4	0.00255628	0.00251861
	G/F-5	0.0029475	0.00330608		G/F-5	0.00313192	0.011578		G/F-5	0.0139574	0.0219039		G/F-5	0.00256559	0.00374694		G/F-5	0.00263239	0.00275532
	G/F-6				G/F-6	0.00259036	0.0069827		G/F-6	0.00649901	0.0259361		G/F-6	0.00312486	0.00286266		G/F-6	0.0023901	0.00217629
	G/F-7								G/F-7	0.00797969	0.0330432		G/F-7		0.0026802		G/F-7	0.00149651
									G/F-8	0.00702266	0.0489791							0.00142598
	Average	0.00263623	0.0023783		Average	0.00298495	0.00882429		Average	0.0094119	0.0265433		Average	0.00263446	0.0028857		Average	0.0023309	0.00354947
		1	0.90216			1	2.95626			1	2.82019			1	1.09537			1	1.52279

## Sheet: Figure 5
	FIGURE 5B to 5G
	OLF cells	#1- 482bp	#2- 1298bp	#3- 1418bp	#4- 1710	#5- 2233	#6- 2842	#7- 3365		Sg3 cells	#1- 482bp	#2- 1298bp	#3- 1418bp	#4- 1710	#5- 2233	#6- 2842	#7- 3365			Mes1 cells	#1- 482bp	#2- 1298bp	#3- 1418bp	#4- 1710	#5- 2233	#6- 2842	#7- 3365
	FireFly 1	1470	4383	15792	2970	25068	3834	4354		FireFly 1	11469	10088	14774	23337	37575	13865	12458			FireFly 1	4788	8499	4150	9055	6729	5692	7804
	FireFly 2	1926	3064	11223	6672	3900	2499	3088		FireFly 2	6366	27661	24077	27352	8283	20253	14955			FireFly 2	5917	4532	2814	6320	6582	6498	8241
	FireFly 3	1788	2772	12974	3105	1926	1764	2618		FireFly 3	24042	18100	10882	28863	27949	21164	10622			FireFly 3	2464	5900	8198	5909	8600	6598	10003
	FireFly 4	3010	3434	7035	3388	4370	4008	6264		FireFly 4	16553	19822	33271	31491	34334	8232	15952			FireFly 4	5091	4418	4455	6338	7295	1867	7362
	FireFly 5	2384	3402	16320	3243	3978	2961	3564		FireFly 5	13914	17053	29906	32994	26559	11051	21275			FireFly 5	4345	6769	3594	10448	7521	5965	4489
	FireFly 6	2007	2873	7182	1696	4563	6542	3955		FireFly 6	19395	29229	26092	24782	26491	19025	16473			FireFly 6	4736	5132	8474	7033	6705	4791	7378
																				FireFly 7	6075	7911	5358	7171	9110	4256	7217
																				FireFly 8	4440	7805	2276	7268	6183	822	9692
	Gaussia 1	10780	14123	14805	10620	13344	5112	8680		Gaussia 1	69055	39699	18086	119095	95665	33390	39795			Gaussia 1	51888	67942	11260	26574	33838	19244	23954
	Gaussia 2	12798	9584	11484	13296	13533	5733	6704		Gaussia 2	29980	119035	29356	104467	20655	51917	40133			Gaussia 2	86414	66697	9504	37959	33838	19503	32796
	Gaussia 3	11082	11438	13972	10773	12198	5544	4886		Gaussia 3	87862	87694	10108	121778	105754	64825	37436			Gaussia 3	20830	163106	17192	38017	46826	25132	36218
	Gaussia 4	15750	11271	9045	14168	12236	6012	10296		Gaussia 4	112282	75779	36745	124814	82119	19657	40636			Gaussia 4	51842	45107	8563	34084	34170	9121	34699
	Gaussia 5	14128	11130	12954	12596	12036	5922	7722		Gaussia 5	78312	82683	29700	124967	90410	31863	79219			Gaussia 5	42804	41335	7935	30013	21032	13372	26475
	Gaussia 6	11583	10140	10488	12992	11934	12426	6097		Gaussia 6	117910	103369	31504	105056	85554	45989	47565			Gaussia 6	46035	40535	14224	110844	71696	35831	29123
																				Gaussia 7	64321	58879	7648	44767	46328	8341	25820
																				Gaussia 8	62511	49979	1829	36241	24740	2144	29070
	G/F-1	7.33333	3.22222	0.9375	3.57576	0.532312	1.33333	1.99357		G/F-1	6.02101	3.93527	1.22418	5.10327	2.54597	2.40822	3.19433			G/F-1	10.8371	7.99412	2.71325	2.93473	5.02868	3.38089	3.06945
	G/F-2	6.64486	3.12794	1.02326	1.99281	3.47	2.29412	2.17098		G/F-2	4.70939	4.30335	1.21925	3.81936	2.49366	2.56342	2.68358			G/F-2	14.6044	14.7169	3.3774	6.00617	5.14099	3.00139	3.97961
	G/F-3	6.19799	4.12626	1.07692	3.46957	6.33333	3.14286	1.86631		G/F-3	3.65452	4.84497	0.928873	4.21917	3.78382	3.06298	3.52438			G/F-3	8.45373	27.6451	2.0971	6.43375	5.44488	3.80903	3.62071
	G/F-4	5.23256	3.28218	1.28571	4.18182	2.8	1.5	1.64368		G/F-4	6.78318	3.82297	1.10442	3.96348	2.39177	2.38788	2.54739			G/F-4	10.1831	10.2098	1.92211	5.37772	4.68403	4.88538	4.71326
	G/F-5	5.92617	3.2716	0.79375	3.88406	3.02564	2	2.16667		G/F-5	5.62829	4.84859	0.993112	3.78757	3.40412	2.88327	3.72357			G/F-5	9.85132	6.10651	2.20785	2.87261	2.79644	2.24174	5.89775
	G/F-6	5.7713	3.52941	1.46032	7.66038	2.61538	1.89942	1.54159		G/F-6	6.0794	3.53652	1.20742		3.22955	2.41729	2.88745			G/F-6	9.72023	7.89848	1.67855	15.7606	10.6929	7.47881	3.94728
																				G/F-7	10.5878	7.44267	1.4274	6.24278	5.0854	1.95982	3.57766
																				G/F-8	14.0791	6.40346	0.803603	4.98638	4.00129	2.60827	2.99938
	Average	6.18437	3.4266	1.09624	4.1274	3.12945	2.02829	1.89713		Average	5.4793	4.21528	1.11288	4.17857	2.97482	2.62051	3.09345			Average	11.0396	11.0521	2.02841	6.32684	5.35933	3.67067	3.97564

## Sheet: Figure 6
Supplemental Data (S5)
	Figure 6A to 6C
	Promoter plus WT1 or Dmrt1
	Mes1 cells	482bp Ctr	482bp WT1	482bp Dmrt1a	1418bp Ctr	1418bp WT1	1418bp Dmrt1a	1710bp Ctr	1710bp WT1	1710bp Dmrt1a
	FireFly 1	8500	5184	3760	9380	8607	16200	22168	15496	17983
	FireFly 2	7938	7943	6595	2938	9054	11789	14522	17217	19455
	FireFly 3	5772	6136	7687	11353	9335	14652	14913	13992	19252
	FireFly 4	5801	6211	3533	2463	2910	3126	13198	11625	19661
	FireFly 5	6222	7547	4024	10732	11038	15444	15446	12356	13340
	FireFly 6	7775	7096	2834	9696	10472	15909	15810	15544	3338
	Gaussia 1	118364	52043	15013	27522	22764	18772	185332	89870	39214
	Gaussia 2	114533	71714	22162	9498	19452	13575	144082	82267	48025
	Gaussia 3	92380	73077	30758	29496	22991	18431	122280	72378	43340
	Gaussia 4	80226	49396	16311	7432	8043	4596	119089	58136	42739
	Gaussia 5	68744	75162	19066	31960	21564	13791	140985	56519	29579
	Gaussia 6	112614	69791	9151	9498	22306	17020	151845	69253	7576
	G/F-1	13.9252	10.0392	3.99282	2.93412	2.64482	1.15877	8.36034	5.79956	2.18062
	G/F-2	14.4284	9.02858	3.36042	3.23281	2.14844	1.1515	9.92164	4.77824	2.46852
	G/F-3	16.0049	11.9096	4.0013	2.59808	2.46288	1.25792	8.19956	5.17281	2.25119
	G/F-4	13.8297	7.95299	4.61676	3.01746	2.76392	1.47025	9.02326	5.00095	2.1738
	G/F-5	11.0485	9.95919	4.73807	2.97801	1.95361	0.892968	9.12761	4.57421	2.21732
	G/F-6	14.4841	9.83526	3.229	0.979579	2.13006	1.06983	9.60436	4.45529	2.26962
	Average	13.9535	9.78745	3.98973	2.62334	2.35062	1.16687	9.03946	4.96351	2.26018
		1	0.701435	0.285931	1	0.896042	0.444804	1	0.549094	0.250034
	Promoter plus WT1 or Dmrt1
	SG3 cells	482bp Ctr	482bp WT1	482bp Dmrt1a	1418bp Ctr	1418bp WT1	1418bp Dmrt1a	1710bp Ctr	1710bp WT1	1710bp Dmrt1a
	FireFly 1	6124	4567	5412	4744	3723	6942	3561	5069	2015
	FireFly 2	3379	3829	6433	4266	3092	4379	4339	6842	2428
	FireFly 3	3379	6760	5920	5472	3078	5442	5857	5576	2666
	FireFly 4	5571	8677	1848	4995	3616	6236	9157	6852	1162
	FireFly 5	4387	6173	9120	3985	4401	6959	5708	7506	1738
	FireFly 6	6798	6205	9578	3397	2458	4240	5376	8500	1278
	Gaussia 1	49794	21711	23217	9568	5676	7778	12617	19055	4852
	Gaussia 2	29284	16837	28893	7522	5115	8130	39940	29353	5431
	Gaussia 3	39559	30075	29360	15120	6460	7846	43568	18575	8348
	Gaussia 4	35113	32881	7422	11144	9494	7922	69251	26638	4461
	Gaussia 5	59830	27012	27849	4302	9795	7697	28242	25260	6414
	Gaussia 6	64369	32076	34189	6840	4681	9442	27081	36283	4551
	G/F-1	8.13096	4.75389	4.28991	2.01686	1.52458	1.12043	3.54311	3.75912	2.40794
	G/F-2	8.66647	4.39723	4.49137	1.76324	1.65427	1.85659	9.20489	4.29012	2.23682
	G/F-3	11.7073	4.44896	4.95946	2.76316	2.09877	1.44175	7.43862	3.33124	3.13128
	G/F-4	6.30282	3.78944	4.01623	2.23103	2.62555	1.27037	7.56263	3.88762	3.83907
	G/F-5	13.638	4.37583	3.05362	1.07955	2.22563	1.10605	4.94779	3.36531	3.69045
	G/F-6	9.46881	5.16938	3.56953	2.01354	1.90439	2.22689	5.03739	4.26859	3.56103
	Average	9.6524	4.48912	4.06335	1.9779	2.00553	1.50368	6.28907	3.817	3.14443
	Set up for 1	1	0.465078	0.420968	1	1.01397	0.76024	1	0.606926	0.499984
	Promoter plus WT1 or Dmrt1
	OLF cells	482bp Ctr	482bp WT1	482bp Dmrt1a	1418bp Ctr	1418bp WT1	1418bp Dmrt1a	1710bp Ctr	1710bp WT1	1710bp Dmrt1a
	FireFly 1	25829	45386	85579	36931	45520	47849	35176	53993	33614
	FireFly 2	31467	44387	113286	51506	50036	58136.4	39298	52531	22476
	FireFly 3	32413	28079	10624	53176	57854	49725.2	69201	51091	32451
	FireFly 4	38805	51537	38494	57540	65882	49996.8	54301	42852	7528
	FireFly 5	40581	58205	82903	44904	68422	56746.8	44118	79092	34021
	FireFly 6	39499	46178	62890	50660	64116	52668.6	68394	28067	44408
	Gaussia 1	53519	38824	11517	17044	12321	7636	73107	31616	5044
	Gaussia 2	92534	52010	18969	16136	16581	10630	54781	24827	3096
	Gaussia 3	67389	27304	2050	21323	16163	23597	101121	27024	3525
	Gaussia 4	77202	56803	4936	20412	20433	5773	84809	19347	876
	Gaussia 5	84797	51849	14004	17082	18415	11828	56218	47695	4472
	Gaussia 6	99891	46377	7238	16558	21928	7882	73108	14472	3768
	G/F-1	2.07205	0.855418	0.134577	0.461509	0.270672	0.159585	2.07832	0.585557	0.150057
	G/F-2	2.94067	1.17174	0.167443	0.313284	0.331381	0.182846	1.39399	0.472616	0.137747
	G/F-3	2.07907	0.972399	0.192959	0.400989	0.279376	0.474548	1.46127	0.528939	0.108625
	G/F-4	1.98949	1.10218	0.128228	0.354745	0.310145	0.115467	1.56183	0.451484	0.116366
	G/F-5	2.08957	0.8908	0.16892	0.380412	0.269139	0.208435	1.27426	0.603032	0.131448
	G/F-6	2.52895	1.00431	0.11509	0.326846	0.342005	0.149653	1.06892	0.515623	0.0848496
	Average	2.2833	0.999474	0.151203	0.372964	0.300453	0.215089	1.4731	0.526209	0.121515
	Set up for 1	1	0.437732	0.0662213	1	0.805582	0.576702	1	0.357212	0.0824896

## Sheet: Figure 7
		Figure 7B to 7G
	Y-specific insert		Ctr	"+WT1"	"+Dmrt1a"			Ctr	"+WT1"	"+Dmrt1a"			Ctr	"+WT1"	"+Dmrt1a"
		OLF cells	PYA	PYB	PYC		Mes1 cells	PYA	PYB	PYC		SG3 cells	PYA	PYB	PYC
		FireFly 1	48215	35472	48590		FireFly 1	1253	1781	2266		FireFly 1	50263	42690	54312
		FireFly 2	57301	57041	58959		FireFly 2	1665	3548	2935		FireFly 2	64820	51958	71278
		FireFly 3	78598	45097	37002		FireFly 3	816	1311	2608		FireFly 3	45820	50478	86518
		FireFly 4	54804	49950	7940		FireFly 4	783	1530	2195		FireFly 4	57257	60427	44254
		FireFly 5	62653	58254	7564		FireFly 5	849	2372	3264		FireFly 5	82954	66806	75168
		FireFly 6	65746	9048	4683		FireFly 6	1339	2636	1929		FireFly 6	65965	45377	23010
		Gaussia 1	1749521	693541	108088		Gaussia 1	107955	53776	29496		Gaussia 1	2018698	808019	112873
		Gaussia 2	2084736	1104979	143850		Gaussia 2	84686	95825	36944		Gaussia 2	2320979	1018340	129946
		Gaussia 3	2504239	970887	87577		Gaussia 3	49023	30859	33391		Gaussia 3	1545995	809999	156413
		Gaussia 4	2113609	1124249	22015		Gaussia 4	64809	74950	40773		Gaussia 4	1986237	1192800	83086
		Gaussia 5	2002857	1167959	21070		Gaussia 5	44633	66347	31196		Gaussia 5	2849116	1336120	125824
		Gaussia 6	2155954	181608	9270		Gaussia 6	69866	110229	27511		Gaussia 6	2165441	787042	85343
		F/G-1	0.027559	0.0511462	0.449541		F/G-1	0.0116067	0.0331189	0.076824		F/G-1	0.0248987	0.0528329	0.481178
		F/G-2	0.027486	0.0516218	0.409864		F/G-2	0.0196609	0.0370258	0.0794446		F/G-2	0.0279279	0.0510223	0.54852
		F/G-3	0.031386	0.0464493	0.422508		F/G-3	0.0166452	0.0424836	0.0781049		F/G-3	0.0296379	0.0623186	0.553138
		F/G-4	0.0259291	0.0444297	0.360663		F/G-4	0.0120817	0.0204136	0.0538346		F/G-4	0.0288269	0.0506598	0.532629
		F/G-5	0.0312818	0.0498768	0.358994		F/G-5	0.0190218	0.0357514	0.104629		F/G-5	0.0291157	0.05	0.597406
		F/G-6	0.0304951	0.0498216	0.505178		F/G-6	0.0191653	0.0239139	0.0701174		F/G-6	0.0304626	0.0576551	0.269618
		Average	0.0290228	0.0488909	0.417791		Average	0.0163636	0.0321179	0.077159		Average	0.0284783	0.0540814	0.497081
		For 1	1	1.68457	14.3953		For 1	1	1.96276	4.71529		For 1	1	1.89904	17.4548
		Figure 7J to 7N
	X-specific insert		Ctr	"+WT1"	"+Dmrt1a"			Ctr	"+WT1"	"+Dmrt1a"			Ctr	"+WT1"	"+Dmrt1a"
		OLF cells	PXA	PXB	PXC		Mes1 cells	PXA	PXB	PXC		SG3 cells	PXA	PXB	PXC
		FireFly 1	133565	115734	87381		FireFly 1	34667	23640	10486		FireFly 1	5876	6420	3709
		FireFly 2	210487	199619	87390		FireFly 2	31620	28518	11894		FireFly 2	4676	5210	3138
		FireFly 3	220922	205267	83786		FireFly 3	29158	38578	8831		FireFly 3	6985	3951	2659
		FireFly 4	249177	164458	62111		FireFly 4	33814	43290	2659		FireFly 4	4717	4128	3117
		FireFly 5	246580	246888	66246		FireFly 5	22539	27224	3825		FireFly 5	5739	2524	3481
		FireFly 6	216642	226373	9114		FireFly 6	24532	32310	2805		FireFly 6	8046	3608	2264
		Gaussia 1	4885	9920	52233		Gaussia 1	40952	34131	135749		Gaussia 1	940	697	888
		Gaussia 2	8209	13799	58821		Gaussia 2	33293	37203	131518		Gaussia 2	914	560	1035
		Gaussia 3	7694	18793	49385		Gaussia 3	31969	42260	92867		Gaussia 3	1836	531	1238
		Gaussia 4	8558	12745	41210		Gaussia 4	38498	39119	16061		Gaussia 4	664	636	1916
		Gaussia 5	10495	23295	40477		Gaussia 5	39522	51288	19491		Gaussia 5	1093	730	1721
		Gaussia 6	10151	23207	6468		Gaussia 6	35662	41744	12456		Gaussia 6	1306	811	1003
		F/G-1	27.3419	11.6667	1.67291		F/G-1	0.846528	0.692625	0.0772455		F/G-1	6.25106	9.2109	4.1768
		F/G-2	25.641	14.4662	1.48569		F/G-2	0.949749	0.766551	0.0904363		F/G-2	5.11597	9.30357	3.03188
		F/G-3	28.7135	10.9225	1.69659		F/G-3	0.912071	0.912873	0.095093		F/G-3	3.80447	7.44068	2.14782
		F/G-4	29.1163	12.9037	1.50718		F/G-4	0.878331	1.10662	0.165556		F/G-4	7.10392	6.49057	1.62683
		F/G-5	23.495	10.5983	1.63663		F/G-5	0.57029	0.530806	0.196244		F/G-5	5.25069	3.45753	2.02266
		F/G-6	21.3419	9.75451	1.40909		F/G-6	0.687903	0.774003	0.225193		F/G-6	6.1608	4.44883	2.25723
		Average	25.9416	11.7187	1.56802		Average	0.807479	0.797247	0.141628		Average	5.61448	6.72535	2.54387
		For 1	1	0.451733	0.0604441		For 1	1	0.987329	0.175395		For 1	1	1.19786	0.453091
