# Supplementary material for: Allelic diversification after transposable element exaptation promotedgsdfas the master sex determining gene of sablefish
Source: HighWire-hosted journal article supplement (doi:10.1101/gr.274266.120), 2021-06-28
Supplement: Supplemental_Table_S1.xlsx [file Supplemental_Table_S1.xlsx]

## Sheet: Sheet1
Supplemental Table 1 (S1)
GeneRacer and gene-specific primers were used for RACE PCR
Primer Assay	Target	Primer Name/ Target Gen	Primer	Product Size
RACE	gsdf mRNA	GeneRacer 5' Primer	F: CGACTGGAGCACGAGGACACTGA
		GeneRacer 5' Primer Nested	F: GGACACTGACATGGACTGAAGGAGTA
		GeneRacer 3' Primer	R: GCTGTCAACGATACGCTACGTAACG
		GeneRacer 3' Primer Nested	R: CGCTACGTAACGGCATGACAGTG
		5' RACE GSP	R: GGTTCTTCCTTGGATGACTGC
		5' RACE GSP Nested	R: GGTTCTTCCTTGGATGACTGC
		3' RACE GSP	F: GCCTAACCATTGTTCAGTGTGC
		3' RACE GSP Nested	F: GAAATGGTTCCCGTCCTCTAC
Genotype	gsdf Promotor	Sexing Assay	F: GTGCAGCCAAATATTGCRTA	Y: 181 X: 593
			R: TGTCAACATTATGTTTTGAGGTGT
		gsdf X-insert (Promotor)	F: ATCACTCATTACAAACTCATGCT	336
			R: AGTTACATTGATAGGAAGACGAAAC
		gsdf Y-Insert (Promotor)	F: GATCACCACTCATTACTTGAATACC	360
			R: ATTAGTCTTTCGCGATATTTACTTC
		gsdf XY (Promotor)	F: TGTGTTGTTGAGGCCTGTAGAA	342
			R: CATGTTATCGACTCCTCGCTGA
Gene Expression	gsdf	gonadal soma-derived factor	F: CATCCTGCCAGCCTAACCAT	104
			R: TGTGATTCAGCATCCTGGACAT
	gsdfX	gonadal soma-derived factor on the X-chromosome	F: CGCTCACCATGTCCTTTATCT	103
			R: GAGGCTGTAGGTTCTTCCTTGG
	gsdfY	gonadal soma-derived factor on the Y-chromosome	F: CGCTCACCATGTCCTTTATCC	103
			R: GAGGCTGTAGGTTCTTCCTTGG
	wt1	wt1 transcription factor	F: CTCCAACCATTCCTTCAAGCAC	160
			R: GTGGCTGTTGTATGGGTTTCTC
	dmrt1	doublesex and mab-3 related transcription factor 1	F: CTGAGGTGATGGTGAAGAATGA	183
			R: AATAGGAAGTTTCCAGCAGCAG
	cyp19a1a	cytochrome P450, family 19, subfamily A, polypeptide 1a, aromatase	F: CATCTGGACTGGTATAGGCACA	136
			R: TCCATTCTTCAGTACATGGTGC
	foxL2	forkhead box l2 (foxl2)	F: CCTACTCCTACGTCGCTCTCAT	220
			R: GTCCAGTAGTTCCCCTTCCTCT
	btf3	basic transcription factor 3	F: GAGATTAGCAGAGACCCTTCCC	142
			﻿R: TGTTTGTTAGTTTGCCTCGTCC
	eef1a	eukaryotic translation elongation factor 1 alpha	F: ACCGGTCACCTGATCTACAAGT	188
			R: TAATACCTGCCGGTCTCAAACT
	rpl4	ribosomal protein L4	F: GGTTGAAGACAAAGTTGAGGGC	131
			R: TCATCTTACCCTTACCAGCACG
